# Supplementary material for: Impact of trauma system structure on injury outcomes: a systematic review protocol
Source: Springer Nature journal article supplement (doi:10.1186/s13643-017-0408-8), 2017-01-21
Supplement: MOESM3 [file 12012578]

Data collection form\*

|                                         |                                                                                                                                                                                                                                                                                      |  |
|-----------------------------------------|--------------------------------------------------------------------------------------------------------------------------------------------------------------------------------------------------------------------------------------------------------------------------------------|--|
| <b>Title of review</b>                  | <b>INFLUENCE OF TRAUMA SYSTEM STRUCTURE ON INJURY OUTCOMES: A SYSTEMATIC REVIEW OF THE LITERATURE</b>                                                                                                                                                                                |  |
| <b>Reviewer</b>                         |                                                                                                                                                                                                                                                                                      |  |
| <b>Date of review</b>                   |                                                                                                                                                                                                                                                                                      |  |
| <b>Form version</b>                     | 1.0 (2016-04-08)                                                                                                                                                                                                                                                                     |  |
| <b>Contact with author</b>              | Date, reason, resolved                                                                                                                                                                                                                                                               |  |
| <b>Notes</b>                            |                                                                                                                                                                                                                                                                                      |  |
| <b>Study identification</b>             |                                                                                                                                                                                                                                                                                      |  |
| <b>Report ID number</b>                 | last name first author - year of the reference                                                                                                                                                                                                                                       |  |
| <b>Study ID number</b>                  | last name first author - year of the primary reference                                                                                                                                                                                                                               |  |
| <b>Title</b>                            |                                                                                                                                                                                                                                                                                      |  |
| <b>Author(s)</b>                        |                                                                                                                                                                                                                                                                                      |  |
| <b>Source 1</b>                         | <input type="checkbox"/> journal article <input type="checkbox"/> abstract <input type="checkbox"/> conference proceeding<br>other (e.g. unpublished data):                                                                                                                          |  |
| <b>Source 2</b>                         | <input type="checkbox"/> Medline <input type="checkbox"/> EMBASE <input type="checkbox"/> CINHAL<br><input type="checkbox"/> BIOSIS <input type="checkbox"/> Cochrane<br><input type="checkbox"/> Reference listing <input type="checkbox"/> Hand search<br>Other (grey literature): |  |
| <b>Year</b>                             |                                                                                                                                                                                                                                                                                      |  |
| <b>Volume</b>                           |                                                                                                                                                                                                                                                                                      |  |
| <b>Page (start-end)</b>                 |                                                                                                                                                                                                                                                                                      |  |
| <b>Contact</b>                          |                                                                                                                                                                                                                                                                                      |  |
| <b>Country</b>                          |                                                                                                                                                                                                                                                                                      |  |
| <b>World Bank income classification</b> | <input type="checkbox"/> low <input type="checkbox"/> lower middle <input type="checkbox"/> upper middle <input type="checkbox"/> high                                                                                                                                               |  |
| <b>Language</b>                         |                                                                                                                                                                                                                                                                                      |  |
| <b>Funding</b>                          | <input type="checkbox"/> NA                                                                                                                                                                                                                                                          |  |
| <b>Notes</b>                            |                                                                                                                                                                                                                                                                                      |  |

| Eligibility of study in the review |                                                                                                                                                                                                                                                                                                                                                                                                                         |                                          |                             |
|------------------------------------|-------------------------------------------------------------------------------------------------------------------------------------------------------------------------------------------------------------------------------------------------------------------------------------------------------------------------------------------------------------------------------------------------------------------------|------------------------------------------|-----------------------------|
| <b>Inclusion Criteria</b>          | <input type="checkbox"/> Listed injury outcome ( <i>mortality, hospitalization, functional capacity, quality of life, burden of injury, adverse events, resource use, healthcare utilization</i> )                                                                                                                                                                                                                      |                                          |                             |
|                                    | <input type="checkbox"/> Evaluation of single or multiple organizational-level interventions for tertiary injury prevention                                                                                                                                                                                                                                                                                             |                                          |                             |
| <b>Notes</b>                       |                                                                                                                                                                                                                                                                                                                                                                                                                         |                                          |                             |
| Study details                      |                                                                                                                                                                                                                                                                                                                                                                                                                         |                                          |                             |
| <b>Setting</b>                     | <i>Country(ies)/province(s)/state(s); trauma system(s); number and level of centers</i>                                                                                                                                                                                                                                                                                                                                 |                                          |                             |
| <b>Period of study</b>             | <i>Dates start-end</i>                                                                                                                                                                                                                                                                                                                                                                                                  |                                          |                             |
| <b>Study inclusion criteria</b>    | <input type="checkbox"/> Age                                                                                                                                                                                                                                                                                                                                                                                            | Criteria:                                | <input type="checkbox"/> NA |
|                                    | <input type="checkbox"/> Injury severity                                                                                                                                                                                                                                                                                                                                                                                | Criteria:                                | <input type="checkbox"/> NA |
|                                    | <input type="checkbox"/> Injury type                                                                                                                                                                                                                                                                                                                                                                                    | Criteria:                                | <input type="checkbox"/> NA |
|                                    | <input type="checkbox"/> Other                                                                                                                                                                                                                                                                                                                                                                                          | <i>List all other inclusion criteria</i> | <input type="checkbox"/> NA |
| <b>Study exclusion criteria</b>    | <i>List all exclusion criteria</i>                                                                                                                                                                                                                                                                                                                                                                                      |                                          | <input type="checkbox"/> NA |
| <b>Ethics approval</b>             | <input type="checkbox"/> yes <input type="checkbox"/> no <input type="checkbox"/> unclear                                                                                                                                                                                                                                                                                                                               |                                          |                             |
| <b>Study design</b>                | <input type="checkbox"/> randomized controlled trial <input type="checkbox"/> non randomized controlled trial <input type="checkbox"/> Interrupted time series <input type="checkbox"/> controlled before-after <input type="checkbox"/> prospective cohort <input type="checkbox"/> retrospective cohort <input type="checkbox"/> uncontrolled quantitative study <input type="checkbox"/> qualitative study<br>Other: |                                          |                             |
| <b>Notes</b>                       |                                                                                                                                                                                                                                                                                                                                                                                                                         |                                          |                             |
| Study data                         |                                                                                                                                                                                                                                                                                                                                                                                                                         |                                          |                             |
| <b>Primary data source</b>         |                                                                                                                                                                                                                                                                                                                                                                                                                         |                                          | <input type="checkbox"/> NA |
| <b>Secondary data source</b>       |                                                                                                                                                                                                                                                                                                                                                                                                                         |                                          | <input type="checkbox"/> NA |
| <b>Other data sources</b>          |                                                                                                                                                                                                                                                                                                                                                                                                                         |                                          | <input type="checkbox"/> NA |
| <b>Notes</b>                       |                                                                                                                                                                                                                                                                                                                                                                                                                         |                                          |                             |
| Population characteristics         |                                                                                                                                                                                                                                                                                                                                                                                                                         |                                          |                             |
| <b>Sample size (n)</b>             | Patients :                                                                                                                                                                                                                                                                                                                                                                                                              |                                          | <input type="checkbox"/> NA |
|                                    | Centers :                                                                                                                                                                                                                                                                                                                                                                                                               |                                          | <input type="checkbox"/> NA |

|                                            |                                                                                                                                                                                                                                       |                             |
|--------------------------------------------|---------------------------------------------------------------------------------------------------------------------------------------------------------------------------------------------------------------------------------------|-----------------------------|
| <b>Age</b>                                 | <i>e.g. n(%) ≥ 65yoa, mean (SD), median (quartiles)</i>                                                                                                                                                                               | <input type="checkbox"/> NA |
| <b>Gender</b>                              | <i>n(%) male</i>                                                                                                                                                                                                                      |                             |
| <b>Mechanism</b>                           | <i>e.g. n(%) penetrating, MVC</i>                                                                                                                                                                                                     | <input type="checkbox"/> NA |
| <b>Injury severity</b>                     | <i>e.g. n(%) ISS &gt; 15, n(%) MAIS &gt; 3, ICISS</i>                                                                                                                                                                                 | <input type="checkbox"/> NA |
| <b>Injury type</b>                         | <i>e.g. n(%) TBI; SCI; thoraco-abdominal; orthopedic; multiple injury types</i>                                                                                                                                                       |                             |
| <b>Notes</b>                               |                                                                                                                                                                                                                                       |                             |
| <b>Outcome (one per outcome)</b>           |                                                                                                                                                                                                                                       |                             |
| <b>Outcome</b>                             |                                                                                                                                                                                                                                       |                             |
| <b>Definition</b>                          |                                                                                                                                                                                                                                       |                             |
| <b>Method of assessment</b>                | <i>Diagnostic criteria or measurement tool used</i>                                                                                                                                                                                   | <input type="checkbox"/> NA |
| <b>Timing of assessment</b>                | <i>e.g. in-hospital</i>                                                                                                                                                                                                               | <input type="checkbox"/> NA |
| <b>Summary risk measure used</b>           | <input type="checkbox"/> prevalence <input type="checkbox"/> incidence proportion <input type="checkbox"/> incidence rate <input type="checkbox"/> mean<br><input type="checkbox"/> unclear <input type="checkbox"/> none<br>Other :  |                             |
| <b>Notes</b>                               |                                                                                                                                                                                                                                       |                             |
| <b>Intervention (one per intervention)</b> |                                                                                                                                                                                                                                       |                             |
| <b>Sample size</b>                         | Intervention group:                                                                                                                                                                                                                   | <input type="checkbox"/> NA |
|                                            | Control group:                                                                                                                                                                                                                        | <input type="checkbox"/> NA |
| <b>Intervention</b>                        |                                                                                                                                                                                                                                       |                             |
| <b>Years since implementation</b>          |                                                                                                                                                                                                                                       |                             |
| <b>Definition</b>                          |                                                                                                                                                                                                                                       |                             |
| <b>ACS recommended</b>                     | <input type="checkbox"/> Yes <input type="checkbox"/> No <input type="checkbox"/> Unclear                                                                                                                                             | <input type="checkbox"/> NA |
| <b>WHO recommended</b>                     | <input type="checkbox"/> Yes <input type="checkbox"/> No <input type="checkbox"/> Unclear                                                                                                                                             | <input type="checkbox"/> NA |
| <b>Type of comparison</b>                  | <input type="checkbox"/> Across <input type="checkbox"/> Within                                                                                                                                                                       |                             |
| <b>Measure of association</b>              | <input type="checkbox"/> GMR <input type="checkbox"/> OR <input type="checkbox"/> RR <input type="checkbox"/> HR<br><input type="checkbox"/> mean difference <input type="checkbox"/> unclear <input type="checkbox"/> none<br>Other: |                             |
| <b>Value of measure of association</b>     |                                                                                                                                                                                                                                       |                             |
| <b>Standard error</b>                      |                                                                                                                                                                                                                                       |                             |
| <b>Confidence intervals</b>                |                                                                                                                                                                                                                                       |                             |
| <b>Risk adjustment</b>                     | <input type="checkbox"/> Yes <input type="checkbox"/> No <input type="checkbox"/> Unclear                                                                                                                                             |                             |
| <b>Risk adjustment variables</b>           |                                                                                                                                                                                                                                       |                             |
| <b>Notes</b>                               |                                                                                                                                                                                                                                       |                             |

NA – not available

\*Adapted from Cochrane Consumer and Communication Review Group Data extraction template
